# Supplementary material for: Sensory acceptable equivalent doses of β-phenylethyl isothiocyanate (PEITC) induce cell cycle arrest and retard the growth of p53 mutated oral cancerin vitroandin vivo
Source: Royal Society of Chemistry journal article supplement (doi:10.1039/c8fo00865e), 2018-01-01

## Electronic Supplementary Information

### Sensory Acceptable Equivalent Doses of $\beta$ - Phenylethyl isothiocyanate (PEITC) Induce Cell Cycle Arrest and Retard Growth of p53 mutated Oral Cancer

*in vitro* and *in vivo*

Aroonwan Lam-ubol, Alison Lea Fitzgerald, Arnat Ritdej, Tawaree Phonyiam, Hui Zhang, Jeffrey N. Myers, Peng Huang and Dunyaporn Trachootham\*

#### Figure S1: A decrease in histologic tumor area by PEITC

Histologic tumor area was measured microscopically at 200x magnification using ImageJ program version 1.47. Kruskal-Wallis test showed statistically significant difference from control group (\*\*,  $p < 0.01$ ).

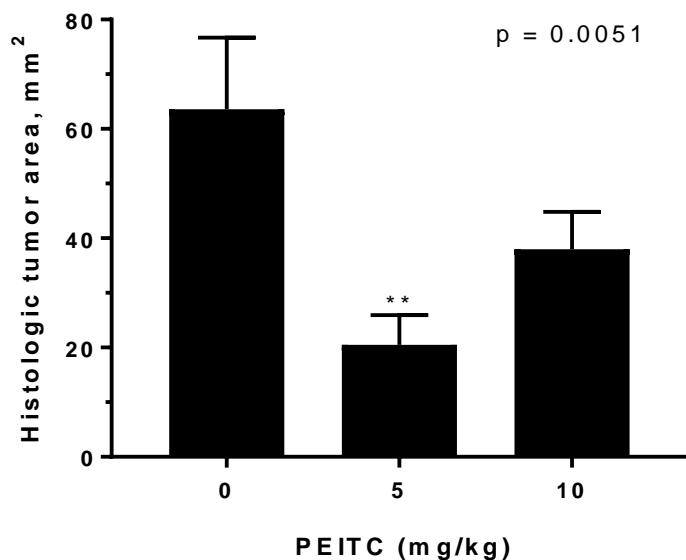

**Figure S2: No significant changes in Ki-67 labeling index by PEITC**

Quantitation of immunohistochemical data of Ki-67 labeling index were calculated from at least 1,000 tumor cells. Each bar represents mean  $\pm$  SEM of seven, seven and eight mice for control, 5 and 10 mg/kg groups, respectively. Kruskal-Wallis test showed no statistically significant difference from control group.

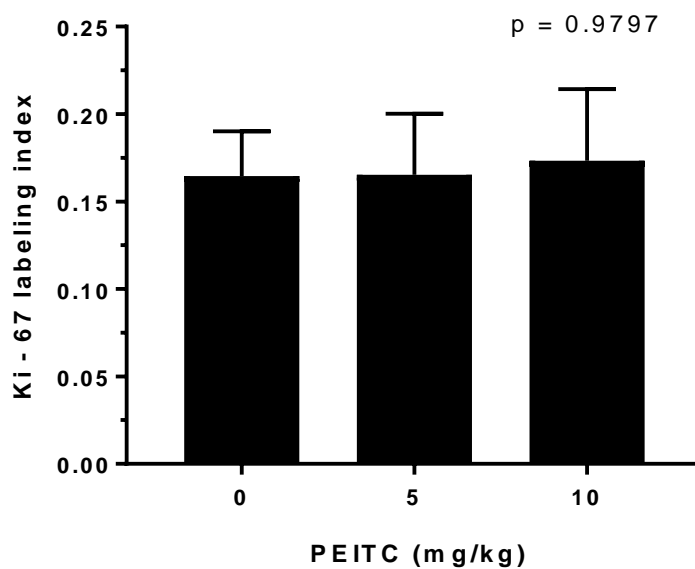

Supplement: c8fo00865e1.pdf [file c8fo00865e1.pdf]
